## Correction

# Correction: MicroRNA-379 inhibits the proliferation, migration and invasion of human osteosarcoma cells by targeting EIF4G2

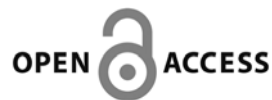

The authors of the original article “MicroRNA-379 inhibits the proliferation, migration and invasion of human osteosarcoma cells by targeting EIF4G2” (*Bioscience Reports* (2017) 37, DOI: 10.1042/BSR20160542) would like to correct Figure 5, as they had mistakenly used images of from another group in place of the blank group in Figure 5F and H due to nonstandard naming of the images. The authors express their sincere apologies for any inconvenience that this error has caused to the readers. The corrected version of Figure 5 is presented here.

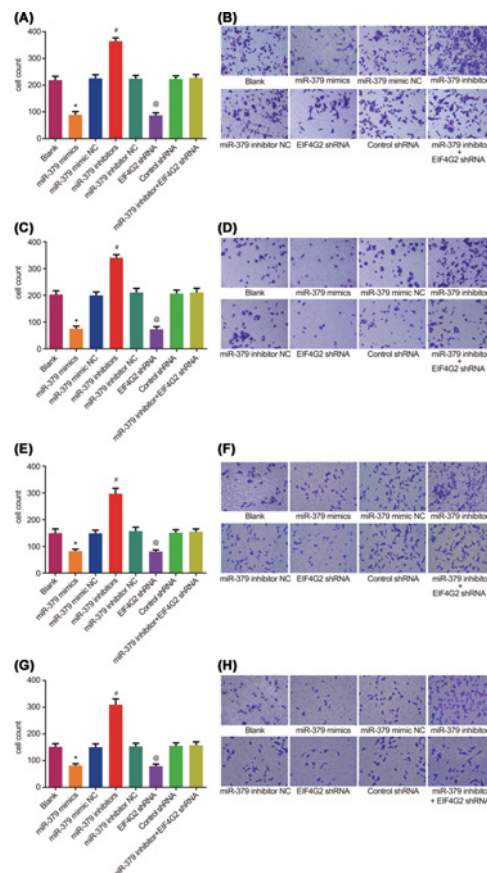

**Figure 5.** The migration and invasion abilities of U2OS and MG-63 cell lines detected by the Transwell assay (A) The number of invasive U2OS cells in each group; (B) images of the invasion of U2OS cells under a light microscope; (C) the number of invasive MG-63 cells in each group; (D) images of the invasion of the MG-63 cells under a light microscope; (E) the number of migrating U2OS cells in each group; (F) images of the migration of U2OS cells under a light microscope; (G) the number of migrating MG-63 cells in each group; (H) images of the migration of the MG-63 cells under a light microscope;  $n = 3$ ; #,  $P < 0.05$  compared with the *miR-379* inhibitor NC group; \*,  $P < 0.05$  compared with the *miR-379* mimic NC group; @,  $P < 0.05$  compared with the control shRNA group.

Version of Record published:  
02 July 2020
